# Supplementary material for: The Antimicrobial Potential of the Neem Tree Azadirachta indica
Source: Front Pharmacol. 2022 May 30;13:891535. doi: 10.3389/fphar.2022.891535 (PMC9195866; doi:10.3389/fphar.2022.891535)
Supplement: Supplementary file 1 [file Table1.XLSX]

## Sheet: Supplementary Table 1
Supplementary Table 1
Extracts and phytochemicals of Azadirachta indica and their identified antimicrobial properties.
Bacteria
Species	Part of plant	Extract	Compound	Findings	Notes	Reference
Alcaligenes faecalis	Leaves	Methanol	Catechin; quercetin; nimbolide; nimbin; azadirachtin	Same as above, except catechin reduced quorum sensing by 96%	Microdilution; biofilms	[1]
Bacillus anthracis	Leaves	Water	N/A	Extract produced ZOI of 10-11 mm; outperformed by garlic extract	Agar well diffusion	[2]
Bacillus subtilis	Leaves	Ethanol	N/A	5% neem seaweed irradiated film produced a 22.05 mm ZOI	Agar diffusion	[3]
	Leaves	Ethanol	N/A	5% neem seaweed irradiated film produced a 8.92 mm ZOI	Agar disc diffusion	[4]
Enterococcus faecalis	Leaves	Water; ethanol	N/A	Water extract MIC: 7.5%; ethanol extract MIC: 1.88%	Serial broth dilution	[5]
	Leaves	Ethanol	N/A	Comparable to 2% chlorhexidine	Agar diffusion	[6]
		Water	N/A	51.98% reduction in CFU/mL compared to control	E. faecalis grown on extracted human teeth	[7]
	Leaves	Ethanol	N/A	Equivalent activity to 2% chlorhexidine or sodium hypochlorite; MIC: 3.9 mg/mL; MBC: 31.25 mg/mL	Agar diffusion	[8]
	Leaves	Ethanol	N/A	Comparable to 2% chlorhexidine and 3% sodium hypochlorite	Agar well diffusion	[9]
	Bark	Ethanol	N/A	MIC: 0.09 mg/mL; MBC: 0.78 mg/mL	Disc diffusion; additive effect when combined with penicillin, tetracycline, and ofloxacin	[10]
Escherichia coli	Seeds	Ethanol	Limonoids	6-homodesacetylnimbin MIC: 128 µg/mL; 17β-hydroxynimbocinol MIC: 32 µg/mL	Isolated 15 limonoids from ethanolic seed extract and tested antibacterial activity	[11]
	Seeds; bark	Acetone; methanol; n-hexane	N/A	Acetone seed extract and methanol bark extract produced the largest ZOI	Agar well disc diffusion	[12]
	Leaves	Acetone; ethanol; methanol; ether; water	N/A	Acetone and ethanol extracts of shade-dried leaves produced the largest ZOI	Cup diffusion	[13]
	Leaves; bark; seeds; roots	Ethanol; methanol; water	N/A	Seed aqueous extract produced a ZOI of 16 mm; ethanol extracts produced ZOI of 15-19 mm; methanol extracts produced ZOI of 10-25 mm	Agar well diffusion	[14]
	Neem oil	N/A	N/A	As effective as ciprofloxacin; ZOI of 9.5-30 mm	0.35% azadirachtin A; 48 isolates (14 diarrheagenic strains) tested; disc diffusion	[15]
	Leaves	Ethanol	N/A	MIC: 125 mg/mL	Broth dilution; shiga toxin-producing strain	[16]
	Leaves	Methanol	SQDG	MIC: 32-128 µg/mL	Microbroth dilution	[17]
	Leaves	Water	N/A	Silver nanoparticles made with aqueous neem leaf extract produced a ZOI of 18.7 mm; MIC and MBC values ranged from 390 to 780 µg/mL		[18]
	Seeds	N/A	N/A	Chitosan‑copper oxide-neem seed biocomposite produced a ZOI of 22 mm		[19]
	Stems	Ethanol	N/A	Hydroxyapatite-neem composite; MIC: 400.0 ± 86.6 μg/mL; MBC: 816.7 ± 76.38 μg/mL		[20]
Escherichia coli O157:H7	Leaves; bark; neem oil	Water; ethyl acetate	N/A	Leaf and bark aqueous extracts eliminated 90% of bacteria in 1.3 days	Azadirachtin and neem oil did not inhibit EcO157; ethyl acetate fraction of leaves was inhibitory in broth culture	[21]
Ex vivo cultured dental caries		Water	N/A	Neem extract produced a larger ZOI than tea tree oil, ginger, garlic, green tea, cinnamon oil, eucalyptus oil, and tumeric	Disc diffusion	[22]
	Twigs	Water; acetone	N/A	Acetone extract of neem twigs was most effective against Streptococcus gordonii, Bacillus subtilis, Pseudomonas fluorescence, and Kochuria kristinae with ZOI between 21-12 mm	Compared to twig extracts from Ocimum sanctum and Vitex negundo; agar well diffusion	[23]
Ex vivo cultures from orthodontic appliances	Leaves	Water	N/A	10% neem extract produced a larger ZOI than katha and cinnamon extracts and 0.2% chlorhexidine	Agar diffusion	[24]
Ex vivo polymicrobial biofilm: Enterococcus faecalis, Streptococcus mutants, Staphylococcus aureus, Candida albicans	Leaves	Methanol	N/A	Individual MIC: 500 µg/mL (E. faecalis), 125 µg/mL (S. mutans), 250 µg/mL (S. aureus); individual MBC: 1 mg/mL (E. faecalis), 250 µg/mL (S. mutans), 500 µg/mL (S. aureus)	75 mg/mL in 10% DMSO resulted in ~33% decrease in polymicrobial biofilm CFU	[25]
Helicobacter pylori	Neem oil	Methanol	N/A	MIC: 25-52 µg/mL; MBC: 43-68 µg/mL	9 strains tested	[26]
	Neem oil	Methanol	Nimbolide; azadirachtin; gedunin	Nimbolide MIC: 1.25-5 µg/mL; nimbolide MBC: 2.5-10 µg/mL	Neem oil and nimbolide kill cells within biofilm; azadirachtin and gedunin are not effective against H. pylori	[27]
	Leaves	Hexane, DCM, chloroform, ethyl acetate, acetone, ethanol	N/A	Ethanol extract produced the largest ZOI, followed by chloroform, then acetone, then ethyl acetate	Agar cup assay	[28]
Klebsiella pneumoniae	Leaves	Hexane; chloroform; methanol; ethanol; water	N/A	Ethanol extract MIC: 12.5 mg/mL; methanol extract MIC: 25 mg/mL	Broth dilution	[29]
	Leaves	Methanol	SQDG	MIC: 256 µg/mL	Microbroth dilution	[17]
	Leaves	N/A	N/A	Silver nanoparticle made using neem leaf extract produced a ZOI of 16 mm and improved healing by 87% in a wounded mouse model	In vitro and in vivo (mouse wound model)	[30]
Lactobacillus acidophilus	Leaves	Ethanol	N/A	MBC: 6.25 mg/mL (neem pastes and extract alone)	Disc diffusion	[31]
Listeria monocytogenes	Leaves	Chloroform; ethanol	N/A	Chloroform extract MIC: 5.0 mg/mL; ethanol extract MIC: 6.5 mg/mL	Tested 4 strains; disc diffusion	[32]
Methicillin-resistant Staphylococcus aureus (MRSA)	Leaves	Ethanol	N/A	MIC: 31.25 mg/mL	Broth dilution	[16]
	Leaves	Ethanol	N/A	Inhibited biofilm aderence at 125 µg/mL	2 strains tested	[33]
	Leaves	Petroleum ether; ethanol	N/A	Petroleum ether extract: MIC: 125 µg/mL and MBC: 500 µg/mL; 1 mg/mL: 68.9% biofilm reduction; 2 mg/mL: 83.8% biofilm reduction	Extracts were non-hemolytic; petroleum ether extract was more effective than 3 other plants tested; micro broth dilution	[34]
Porphyromonas gingivalus	Leaves	Ethanol	N/A	50% growth inhibition with 5 µM (GAE) of extract	Broth microdilution	[35]
Pseudomonas aeruginosa	Leaves	Methanol; chloroform	N/A	Methanol leaf extract produced the largest ZOI (42 mm); chloroform leaf extract produced a 38 mm ZOI	Disc diffusion; neem extracts produced larger ZOI than guava and custard apple extracts	[36]
	Seeds	Ethanol	Limonoids	MIC of 6-homodesacetylnimbin and nimbinene was 128 µg/mL	Isolated 15 limonoids from ethanolic seed extract and tested antibacterial activity	[11]
	Seeds; bark	Acetone; methanol; n-hexane	N/A	Acetone seed and bark extracts produced the largest ZOI	Agar well disc diffusion	[12]
	Leaves	Methanol	SQDG	MIC: 128 µg/mL	Microbroth dilution	[17]
	Leaves	Water	N/A	Silver nanoparticles made with aqueous neem leaf extract produced a ZOI of 10.3 mm; MIC and MBC values ranged from 390 to 780 µg/mL		[18]
Pseudomonas gingivalis	Leaves	Methanol	Catechin; quercetin; nimbolide; nimbin; azadirachtin	Compounds had maximum efficacy at 180-250 µg/mL; catechin was the most effective with 92% inhibition at 180 µg/mL; catechin reduced quorum sensing by 94% and reduced the DNA, RNA, protein, and carbohydrates in the biofilm EPS	Microdilution; biofilms	[1]
Salmonella spp.	Leaves	Acetone; ethanol; methanol; ether; water	N/A	Ethanol and methanol extracts of shade-dried leaves produced the largest ZOI	Cup diffusion	[13]
	Whole plant	Methanol; chloroform	N/A	2.0 mg/mL methanol extract inhibited 70% of growth; 2.0 mg/mL chloroform extract inihibited 45% of growth	Clinical isolates; agar dilution	[37]
	Stem; bark	Methanol	N/A	Extracts produced ZOI of 9-15 mm	Agar diffusion	[38]
	Bark	Methanol; ethanol; acetone; water	N/A	Ethanol extract performed best with ZOI of 20-23 mm; all extracts produced ZOI of 10-25 mm	Agar diffusion	[39]
Salmonella typhi	Seeds; bark	Acetone; methanol; n-hexane	N/A	Acetone seed and bark extracts produced the largest ZOI	Agar well disc diffusion	[12]
	Leaves	Methanol	SQDG	MIC: 32-64 µg/mL	Microbroth dilution	[17]
Shigella spp.	Whole plant	Methanol; chloroform	N/A	2.0 mg/mL methanol extract inhibited 85% of growth; 2.0 mg/mL chloroform extract inihibited 52% of growth	Clinical isolates; agar dilution	[37]
	Stem; bark	Methanol	N/A	Stem methanol extract produced ZOI of 13-14 mm	Agar diffusion	[38]
	Leaves	Methanol	SQDG	MIC: 32-64 µg/mL	Microbroth dilution	[17]
Staphylococcus aureus	Bark	Methanol	N/A	2% neem oil extract decreased biofilm staining and CFU		[40]
	Leaves	Ethanol	N/A	5% neem seaweed irradiated film produced a 13.15 mm ZOI	Agar disc diffusion	[3]
	Leaves	Ethanol	N/A	5% neem seaweed irradiated film produced a 12.61 mm ZOI	Agar disc diffusion	[4]
	Leaves	Methanol; chloroform	N/A	Chloroform leaf extract produced the largest ZOI (42 mm); methanol leaf extract produced a 39 mm ZOI	Disc diffusion; neem extracts produced larger ZOI than guava and custard apple extracts	[36]
	Leaves	Water	N/A	Reduced growth by 85% compared to calcium alginate fibers	Sodium alginate fibers for wound dressings; neem outperformed papaya	[41]
	Leaves	Methanol	N/A	Comparable ZOI to pure extract (18.23 mm vs 20.25 mm); did not cause skin irritation in albino mice	Microspheres containing extract were incorporated into topical gel	[42]
	Seeds; bark	Acetone; methanol; n-hexane	N/A	Acetone seed extract and methanol bark extract produced the largest ZOI	Agar well disc diffusion	[12]
	Leaves	Chloroform; ethanol	N/A	Ethanol extract MIC: 4.5-6.5 mg/mL	Tested 4 strains; disc diffusion	[32]
	Leaves	Ethanol	N/A	Inhibited biofilm adherence at 62.5 µg/mL		[33]
	Leaves	Methanol	SQDG	MIC: 128-256 µg/mL	Microbroth dilution	[17]
	Seeds (ripe and unripe)	Methanol	N/A	MBIC: 75 µg/mL (unripe), 100 µg/mL (ripe); MBEC: 500 µg/mL (unripe), 300 µg/mL (ripe)		[43]
	Leaves	Water	N/A	Silver nanoparticles made with aqueous neem leaf extract produced a ZOI of 17.7 mm; MIC and MBC values ranged from 390 to 780 µg/mL		[18]
	Seeds	N/A	N/A	Chitosan‑copper oxide-neem seed biocomposite produced a ZOI of 23 mm		[19]
	Stems	Ethanol	N/A	Hydroxyapatite-neem composite; MIC: 266.7 ± 28.87 μg/mL; MBC: 600.0 ± 50.0 μg/mL		[20]
	Leaves	Methanol	N/A	Polyvinyl alcohol-neem-chitosan blend nanofibrous mat produced a ZOI of 14.5 mm		[44]
Staphylococcus epidermidis	Seeds	Ethanol	Limonoids	17β-hydroxynimbocinol MIC: 128 µg/mL; 2,3-dihydronimbolide MIC: 64 µg/mL	Isolated 15 limonoids from ethanolic seed extract and tested antibacterial activity	[11]
Streptococcus mutans	Leaves	Water; ethanol	N/A	Both extracts had MIC of 7.5%	Serial broth dilution	[5]
	Leaves	Ethanol	N/A	Polyethylene paste made with the extract plus zinc oxide MBC: 0.4 mg/mL	Disc diffusion	[31]
	Neem oil	N/A	N/A	3% neem mouthwash worked as well as 0.2% chlorhexidine to disinfect toothbrushes; 88% reduction in S. mutans CFU after 12-hr treatment		[45]
	Leaves	Water	N/A	MIC: 4.2 mg/mL	Well diffusion and ZOI	[46]
	N/A	N/A	Azadirachtin	40% azadiractin in water as effective as 0.2% chlorhexidine	S. mutans cultured from ex vivo plaques	[47]
	Neem-based toothpaste (Babool, Dabur Pvt Ltd, New Delhi)	N/A	N/A	Neem-based toothpaste worked as well as a probiotic toothpaste to reduce the number of S. mutans in saliva when used twice a day for 60 days	Small trial of 60 patients - 30 per group	[48]
	2.5% neem gel	N/A	N/A	Neem gel worked as well as 0.2% chlorhexidine gel to reduce plaque and gingivitis scores, S. mutans, and Lactobacilli after 30 and 90 days	Small trial of 60 patients – 30 per group	[49]
Streptococcus viridans	Bark	Methanol	N/A	2% neem oil extract decreased biofilm staining and CFU		[40]
Vibrio cholerae	Leaves	Methanol	SQDG	MIC: 64 µg/mL	Microbroth dilution	[17]
	Seeds (ripe and unripe)	Methanol	N/A	MBIC: 100 µg/mL (unripe), 300 µg/mL (ripe); MBEC: 700 µg/mL (unripe), 500 µg/mL (ripe)		[43]
	Leaves	Methanol	N/A	Extract had significant antibacterial activity against O1, O139, and other serotypes; MIC50: 2.5 mg/mL; MIC90: >5 mg/mL; MBC: 10 mg/mL; antisecretory activity on V. cholerae-induced fluid secretion in mouse intestine with inhibition values of 27.7%, 41.1%, 43.3%, 57.0%, and 77.9% at doses of 100, 200, 300, 450 and 1800 mg/kg, respectively; oral administration inhibited hemorrhage in the intestine…	In vitro and in vivo (mouse model)	[50]
Vibrio parahaemolyticus	Stems and leaves	Water	N/A	MIC: 62.5 mg/mL; MBC: 125 mg/mL		[51]
Fungi
Species	Part of plant	Extract	Compound	Findings	Notes	Reference
Aspergillus carbonarius	Seeds	Neem oil	N/A	0.3% neem oil inhibited 97.6% of growth; 0.1% and 0.3% neem oil inhibited ochratoxin A production	Neem oil contained 0.12% p/p of azadirachtin; 6 strains tested	[52]
Aspergillus flavus	Seed	Methanol; ethanol	N/A	At 10%, both extracts inhibited growth		[53]
Aspergillus niger	Seed; bark; leaves	Ethanol; water	N/A	Growth inhibition of extracts: 88.37% (ethanolic seed), 87.12% (aqueous stem bark), 81.78% (aqueous seed), 77.52% (ethanolic leaves), 72.87% (aqueous leaves)		[54]
Aspergillus parasiticus	Leaves	N/A	N/A	Inhibited aflatoxin synthesis for 4 months (wheat) or 2 months (maize) after inoculation with spores		[55]
	Seed	Methanol; ethanol	N/A	At 10%, both extracts inhibited growth		[53]
Candida albicans	Leaves	Ethanol	N/A	MIC: 3.75%		[5]
	Leaves	Water; ethanol	N/A	Both extracts worked as well as 2% chlorhexidine to reduce biofilms grown on extracted human teeth		[56]
	Leaves	Water	N/A	MIC: 5 mg/mL	Well diffusion and ZOI	[46]
Candida tropicalis	Leaves	Proteins extracted with Tris-HCL buffers and precipitated with TCA-acetone	N/A	Polypeptides in fragment A (11, 13, and 14 kDa) produced the largest ZOI (24 mm)	Polyacrylamide gel-agar overlay diffusion assay (PAG-ADA)	[57]
Fusarium oxyporium	Seed; bark; leaves	Ethanol; water	N/A	100% inhibition by ethanolic extracts of seeds and leaves; 87.60% inhibition by aqueous leaf extract		[54]
Pythium spp.	Seed; bark; leaves	Ethanol; water	N/A	Ethanolic extracts of seeds and leaves produced the highest levels of inhibition and worked as well as ketoconazole		[54]
Viruses
Species	Part of plant	Extract	Compound	Findings	Notes	Ref.
Dengue (DENV)	N/A	N/A	Kaempferol 3-O-β-rutinoside; epicatechin; rutin; hyperoside; quercetin	Inhibited DENV-2 infectivity by 77.7% (100 µM kaempferol 3-O-β-rutinoside) and 66.2% (1000 µM epicatechin); no significant cell toxicity	Screened 49 bioflavonoids for binding to NS2B-NS3pro; in silico	[58]
	N/A	N/A	5 triterpenoids: nimbin, desacetylnimbin, desacetylsalannin, azadirachtin, and salannin	Nimbin, desacetylnimbin, and desacetylsalannin bind NS2B-NS3pro with high affinity in silico and in vitro		[59]
	N/A	N/A	Nimbin; gedunin; azadirone; salannin; nimbidol; azadirachtin	Nimbin had the strongest binding to the envelope protein of all 4 types of DENV; gedunin and azadirone also had high binding affinities to all 4 envelope proteins	In silico	[60]
Hepatitis C Virus (HCV)	Leaves	N/A	“active phytochemicals”	3-deacetyl-3-cinnamoyl-azadirachtin showed the highest level of binding to the NS3/4A protease of HCV	In silico	[61]
Herpes Simplex Virus (HSV)	Leaves	Methanol	SQDG	EC50: 9.1 µg/mL (HSV-1) and 8.5 µg/mL (HSV-2)	Infected and treated macrophages produce less proinflammatory cytokines than untreated controls	[17]
	Bark	Water	N/A	Aqueous neem bark extract significantly blocked HSV-1 entry into cells at 50 to 100 μg/mL		[62]
	Leaves	Water	Polysaccharides	Two polysaccharides and their chemically sulfated derivatives were nontoxic to HEp-2 cells up to 1000 μg/mL; the sulfated versions had antiviral activity (50% inhibition by 31.1 μg/mL and 80.5 μg/mL; viral nucleic acid synthesis was inhibited by 25-50 μg/mL of the polysaccharides		[63]
Human immunodeficiency virus (HIV)	Leaves	Water	N/A	1.0 g/day for 12 weeks resulted in increased mean CD4+ T cell counts (159%), decreased incidence of HIV/AIDS-related pathologies from 120 (baseline) to 5, as well as increased mean bodyweight, hemoglobin concentration, and lymphocyte counts	Small human study with 50 patients	[64]
	Leaves	Water	N/A	1000 mg/day for 30 days in 10 patients resulted in increased haemoglobin concentration, mean CD4+ cell count, erythrocyte sedimentation rate, mean bodyweight, and platelet count	In vitro and in vivo (small patient study)	[65]
	Leaves	Ethanol	N/A	Neem extract displayed a concentration-dependent ability to limit CD4+ T cell activation	Ex vivo (T cells isolated from peripheral blood mononuclear cells of HIV positive or negative patients)	[66]
Influenza	N/A	N/A	Nimbaflavone; rutin; hyperoside	Hyperoside interacted the strongest with conserved residues of nucleoprotein	In silico	[67]
	N/A	N/A	Tetratriacontane; 6-o-acetylnimbandiol; rutin; tiplasinin; hyperoside; nimocinolide; quercitrin	All compounds showed perfect binding with conserved residues of NS1 protein; the binding residues of 6-o-acetylnimbandiol, rutin, and tiplasinin were conserved in all strains tested	In silico	[68]
Japanese encephalitis virus (JEV)	N/A	N/A	Bioflavonoids	Gedunin, nimbolide, ohchinin acetate, and kulactone bound with high affinity to the RNA-dependent RNA polymerase from JEV	In silico	[69]
SARS-CoV-2	N/A	N/A	Leaves: quercetin, nimbosterol, nimbolide; flowers: palmitic acid, oleic acid, linoleic acid; bark: margocin, nimbidiol, nimbione; seeds: azadiradione, fraxinellone, salannin, salannol, vepinin, azadirone, gedunin, azadirachtin H, nimbin, deacetylgedunin	Desacetylgedunin showed the highest binding affinity towards the papain-like protease	In silico	[70]
	N/A	N/A	70 compounds	Nimbolin A and nimocin had the strongest binding to envelope and membrane proteins	In silico	[71]
	N/A	N/A	154 phytochemicals (limonoids and triterpenoids) from multiple plants; from neem: 7-deacetyl-7-benzoylgedunin, epoxyazadiradione, 7-deacetylgedunin, azadiradionolide, gedunin	Glycyrrhizic acid, limonin, 7-deacetyl-7-benzoylgedunin (neem), maslinic acid, corosolic acid, obacunone, and ursolic acid bound to all target proteins (proteases, spike glycoprotein-receptor binding domain, RNA-dependent RNA polymerase, and ACE2)	In silico	[72]
	N/A	N/A	1295 phytochemicals from multiple plants	Epicatechin had strong binding to the main protease	In silico	[73]
	N/A	N/A	Nimolicinol	Strong affinity for main protease and spike protein	In silico	[74, 75]
	N/A	N/A	605 phytochemicals from 37 plant species	Quercetin, 5,7-dihydroxy-4’-methoxy-8.3’-di-C-prenylflavanone, and taraxerol bind strongly to the main protease, NSP10-NSP16, and spike glycoprotein of SARS-CoV-2, respectively	In silico	[76]
	N/A	N/A	98 phytochemicals from multiple plants	Quercetin binds with high affinity to the main spike protein	In silico	[77]
	N/A	N/A	163 phytochemicals and drugs	From neem, limonin, gedunin, and epicatechin bind the active sites of furin	In silico	[78]
	N/A	N/A	86 compounds from neem and Momordica charantia	Nimbandiol and 17-hydroxyazadiradione have binding affinities for the main protease	In silico	[79]
	N/A	N/A	38 bioactive compounds from neem, Curcuma longa, Zingiber officinale, Ocimum basilicum, and Panax ginseng	Out of all compounds, nimbin, nimbolide, salannin, gedunin, and epoxyazadiradione were the top five with highest affinity to the receptor for the main protease	In silico	[80]
	Bark	Methanol	N/A	In vitro, 200 μg/mL neem bark extract prevented death of SARS-CoV-2-infected cells and reduced viral replication; in vivo, the extract restricted viral replication and proinflammatory cytokine expression and reduced meningitis, encephalitis, myelitis, and hepatitis in infected animals	In vitro and in vivo (mouse model)	[81]
	N/A	N/A	N/A	N/A	Planned clinical trial for neem extract as a mouthwash/nasal spray	[82]
	Leaves		N/A	Leaf extract capsule was 55% effective	Completed trial	[83]
	N/A	N/A	N/A	N/A	Planned clinical trial for neem mouthwash/nasal spray to reduce intra-oral viral load in COVID-19 patients	[84]
Parasites
Species	Part of plant	Extract	Compound	Findings	Notes	Reference
Leishmania donovani	Leaves	Ethyl acetate fraction	N/A	Kills parasites; promastigotes underwent apoptosis-like death with IC50 of 52.4 µg/mL; intracellular amastigotes were killed in vitro and in vivo	In vitro	[85]
Plasmodium berghei	Leaves	Ethanol	N/A	Reduced parasitemia by 30-62% in BALB/c mice; doses of 75-300 mg/kg body weight were effective and nontoxic	Mouse model	[86]
	Leaves; bark; seeds	Methanol	N/A	Leaf extract: LD50 of 31.62 mg/kg body weight and reduced parasitemia by 51-80%; bark extract: LD50 of 489.90 mg/kg body weight and reduced parasitemia by 56-87%	Mouse model	[87]
	Bark	Water	N/A	All extracts of all plants tested showed significant antiplasmodial activity; neem led to 92% parasite suppression	Mouse model	[88]
	Seeds	Methanol	N/A	Unripe fruit seed kernel extract decreased erythrocyte infection by 30% in C57BL/6 mice only	Mouse model	[89]
	Seeds	Methanol	Deacetylnimbin; nimbin; azadirachtin A	Deacetylnimbin interferes with early sporogony stages with higher activity than nimbin and similar potency to azadirachtin A	In vitro	[90]
	Leaves	Water	N/A	Extract reduced blood markers of malaria-induced renal injury and was non-toxic at 500-2,000 mg/kg body weight	Mouse model	[91]
Plasmodium falciparum	Leaves	Methanol	N/A	Methanol extract was most active with IC50 <10 µg/mL against chloroquine resistant and sensitive clones and resulted in 89% parasite clearance in vivo	Mouse model; neem was more effective than 12 other plants tested	[92]
	Stem; leaves	Water	N/A	IC50 of 6.25-12.5 µg/mL (24 hrs) and 2.35-6.8 µg/mL	In vitro parasite incorporation of 3H-hypoxanthine; tested two strains, chloroquine resistant and sensitive	[93]
	Leaves		Gedunin	Leaf extract and gedunin were effective against both clones tested		[94]
	Leaves	Water	N/A	Aqueous neem leaf extract led to improved maternal and placental weight gain, reduced average parasitemia from 24.69% to 3.90%, increased platelet counts, and lower markers of preeclampsia	In vivo (rat gestational malaria model)	[95]
	N/A	N/A	Azadirachtin	Azadirachtin binds Gephyrin R, almost as well as artesunate does	In silico	[96]
Raillietina spp. (poultry)	N/A	N/A	SQDG	Severely paralyzed, damaged, or killed by short exposures to 0.5-1.0 mg/mL		[97]
Schistosoma mansoni	Leaves	Ethanol	N/A	Severe tegument changes; 80% of worms had significant reduction of motor activity after exposure to 100 µg/mL for 96 hrs; 100% mortality of females after exposure to 50 µg/mL for 72 hrs; 100% mortality of males after exposure to 300 µg/mL for 24 hrs		[33]
Strongyloides (bovine)	Leaves	Dried powder	N/A	500 mg/kg body weight worked as well as 5 mg/kg fenbendazole to treat cows in vivo		[98]
Abbreviations: Gallic-Acid Equivalents (GAE), Minimum Inhibitory Concentration (MIC), Minimum Bactericidal Concentration (MBC), Minimum Biofilm Inhibitory Concentration (MBIC), Minimum Biofilm Eradication Concentration (MBEC), Zone of Inhibition (ZOI), half maximal Effective Concentration (EC50), half maximal Inhibitory Concentration (IC50), Lethal Dose 50 (LD50), Nonstructural Protein (NSP)
References
1	Lahiri D, Nag M, Dutta B, Mukherjee I, Ghosh S, Dey A, et al. Catechin as the Most Efficient Bioactive Compound from Azadirachta indica with Antibiofilm and Anti-quorum Sensing Activities Against Dental Biofilm: an In Vitro and In Silico Study. Appl Biochem Biotechnol. 2021;193(6):1617-30. Epub 2021/01/27. doi: 10.1007/s12010-021-03511-1. PubMed PMID: 33496925.
2	Kaur R, Tiwari A, Manish M, Maurya IK, Bhatnagar R, Singh S. Common garlic (Allium sativum L.) has potent Anti-Bacillus anthracis activity. J Ethnopharmacol. 2021;264:113230. Epub 2020/08/28. doi: 10.1016/j.jep.2020.113230. PubMed PMID: 32853741.
3	Uthaya Kumar US, Abdulmadjid SN, Olaiya NG, Amirul AA, Rizal S, Rahman AA, et al. Extracted Compounds from Neem Leaves as Antimicrobial Agent on the Physico-Chemical Properties of Seaweed-Based Biopolymer Films. Polymers (Basel). 2020;12(5). Epub 2020/05/20. doi: 10.3390/polym12051119. PubMed PMID: 32422913; PubMed Central PMCID: PMCPMC7284887.
4	Oyekanmi AA, Kumar USU, H PSA, Olaiya NG, Amirul AA, Rahman AA, et al. Functional Properties of Antimicrobial Neem Leaves Extract Based Macroalgae Biofilms for Potential Use as Active Dry Packaging Applications. Polymers (Basel). 2021;13(10). Epub 2021/06/03. doi: 10.3390/polym13101664. PubMed PMID: 34065404; PubMed Central PMCID: PMCPMC8161299.
5	Nayak Aarati NRN, G Soumya B., Bhat Kishore, Kudalkar Mithun. EVALUATION OF ANTIBACTERIAL AND ANTICANDIDIAL EFFICACY OF AQUEOUS AND ALCOHOLIC EXTRACT OF NEEM (AZADIRACHTA INDICA) AN IN VITRO STUDY. International Journal of Research in Ayurveda and Pharmacy. 2011;2(1):230-5.
6	Chandrappa PM, Dupper A, Tripathi P, Arroju R, Sharma P, Sulochana K. Antimicrobial activity of herbal medicines (tulsi extract, neem extract) and chlorhexidine against Enterococcus faecalis in Endodontics: An in vitro study. J Int Soc Prev Community Dent. 2015;5(Suppl 2):S89-92. Epub 2016/03/05. doi: 10.4103/2231-0762.172952. PubMed PMID: 26942123; PubMed Central PMCID: PMCPMC4756573.
7	Bhardwaj A, Srivastava N, Rana V, Adlakha VK, Asthana AK. How efficacious are Neem, Tulsi, Guduchi extracts and chlorhexidine as intracanal disinfectants? A comparative ex vivo study. Ayu. 2017;38(1-2):70-5. Epub 2017/01/01. doi: 10.4103/ayu.AYU_72_16. PubMed PMID: 29861597; PubMed Central PMCID: PMCPMC5954265.
8	Joy Sinha D, K DSN, Jaiswal N, Vasudeva A, Prabha Tyagi S, Pratap Singh U. Antibacterial Effect of Azadirachta indica (Neem) or Curcuma longa (Turmeric) against Enterococcus faecalis Compared with That of 5% Sodium Hypochlorite or 2% Chlorhexidine in vitro. Bull Tokyo Dent Coll. 2017;58(2):103-9. Epub 2017/07/21. doi: 10.2209/tdcpublication.2015-0029. PubMed PMID: 28724858.
9	Mustafa M. Antibacterial Efficacy of Neem (Azadirachta indica) Extract against Enterococcus faecalis: An in vitro Study. J Contemp Dent Pract. 2016;17(10):791-4. Epub 2016/10/30. doi: 10.5005/jp-journals-10024-1932. PubMed PMID: 27794147.
10	Arora S, Saquib SA, Algarni YA, Kader MA, Ahmad I, Alshahrani MY, et al. Synergistic Effect of Plant Extracts on Endodontic Pathogens Isolated from Teeth with Root Canal Treatment Failure: An In Vitro Study. Antibiotics (Basel). 2021;10(5). Epub 2021/06/03. doi: 10.3390/antibiotics10050552. PubMed PMID: 34065139; PubMed Central PMCID: PMCPMC8151008.
11	Lu XF, Lin PC, Zi JC, Fan XN. [Limonoids from seeds of Azadirachta indica and their antibacterial activity]. Zhongguo Zhong Yao Za Zhi. 2019;44(22):4864-73. Epub 2019/12/25. doi: 10.19540/j.cnki.cjcmm.20190813.202. PubMed PMID: 31872594.
12	Melese Sinaga KG, Suresh Kumar P. Nair and Sharmila Banu Gani. PRELIMINARY PHYTOCHEMICAL ANALYSIS AND IN VITRO ANTIBACTERIAL ACTIVITY OF BARK AND SEEDS OF ETHIOPIAN NEEM (AZADIRACHTA INDICA A. JUSS). WORLD JOURNAL OF PHARMACY AND PHARMACEUTICAL SCIENCES. 2016;5(4):1714-23.
13	S. Susmitha KKV, P. Ranganayaki and R. Vijayaragavan. Phytochemical Extraction and Antimicrobial Properties of Azadirachta indica (Neem). Global Journal of Pharmacology. 2013;7(3):316-20.
14	Sharma Y DD, and Srivastva S. Nupur. COMPARATIVE STUDY OF DIFFERENT PARTS OF AZADIRACHTA INDICA (NEEM) PLANT ON THE BASIS OF ANTIBACTERIAL ACTIVITY, PHYTOCHEMICAL SCREENING AND ITS EFFECT ON RAT PC-12 (PHEOCHROMOCYTOMA) CELL LINE. International Journal of Biotechnology, Humanities, Sports and Allied Fields. 2014;2(7):144-54.
15	Del Serrone P, Toniolo C, Nicoletti M. Neem (Azadirachta indica A. Juss) Oil to Tackle Enteropathogenic Escherichia coli. Biomed Res Int. 2015;2015:343610. Epub 2015/06/13. doi: 10.1155/2015/343610. PubMed PMID: 26064900; PubMed Central PMCID: PMCPMC4433627.
16	Zihadi MAH, Rahman M, Talukder S, Hasan MM, Nahar S, Sikder MH. Antibacterial efficacy of ethanolic extract of Camellia sinensis and Azadirachta indica leaves on methicillin-resistant Staphylococcus aureus and shiga-toxigenic Escherichia coli. J Adv Vet Anim Res. 2019;6(2):247-52. Epub 2019/08/28. doi: 10.5455/javar.2019.f340. PubMed PMID: 31453199; PubMed Central PMCID: PMCPMC6702883.
17	Bharitkar YP, Bathini S, Ojha D, Ghosh S, Mukherjee H, Kuotsu K, et al. Antibacterial and antiviral evaluation of sulfonoquinovosyldiacylglyceride: a glycolipid isolated from Azadirachta indica leaves. Lett Appl Microbiol. 2014;58(2):184-9. Epub 2013/10/15. doi: 10.1111/lam.12174. PubMed PMID: 24118020.
18	Chinnasamy G, Chandrasekharan S, Koh TW, Bhatnagar S. Synthesis, Characterization, Antibacterial and Wound Healing Efficacy of Silver Nanoparticles From Azadirachta indica. Front Microbiol. 2021;12:611560. Epub 2021/03/09. doi: 10.3389/fmicb.2021.611560. PubMed PMID: 33679635; PubMed Central PMCID: PMCPMC7932996.
19	Revathi T, Thambidurai S. Cytotoxic, antioxidant and antibacterial activities of copper oxide incorporated chitosan-neem seed biocomposites. Int J Biol Macromol. 2019;139:867-78. Epub 2019/08/04. doi: 10.1016/j.ijbiomac.2019.07.214. PubMed PMID: 31376446.
20	Nagaraj A, Samiappan S. Presentation of Antibacterial and Therapeutic Anti-inflammatory Potentials to Hydroxyapatite via Biomimetic With Azadirachta indica: An in vitro Anti-inflammatory Assessment in Contradiction of LPS-Induced Stress in RAW 264.7 Cells. Front Microbiol. 2019;10:1757. Epub 2019/08/27. doi: 10.3389/fmicb.2019.01757. PubMed PMID: 31447805; PubMed Central PMCID: PMCPMC6692563.
21	Ravva SV, Korn A. Effect of Neem (Azadirachta indica) on the Survival of Escherichia coli O157:H7 in Dairy Manure. Int J Environ Res Public Health. 2015;12(7):7794-803. Epub 2015/07/18. doi: 10.3390/ijerph120707794. PubMed PMID: 26184255; PubMed Central PMCID: PMCPMC4515691.
22	Kanth MR, Prakash AR, Sreenath G, Reddy VS, Huldah S. Efficacy of Specific Plant Products on Microorganisms Causing Dental Caries. J Clin Diagn Res. 2016;10(12):ZM01-ZM3. Epub 2017/02/18. doi: 10.7860/JCDR/2016/19772.9025. PubMed PMID: 28209019; PubMed Central PMCID: PMCPMC5296592.
23	Kalita C, Raja D, Saikia A, Saikia AK. Antibacterial property of Azadirachta indica, Ocimum sanctum, and Vitex negundo against oral microbes. J Conserv Dent. 2019;22(6):602-6. Epub 2020/10/23. doi: 10.4103/JCD.JCD_268_19. PubMed PMID: 33088074; PubMed Central PMCID: PMCPMC7542067.
24	Jagannathan J, Nagar P, Kaniappan AS, Raveendran A, Shekhar S. Comparison of Antimicrobial Efficacy of Natural Extracts as a Disinfectant for Removable Orthodontic Appliances: An Ex Vivo Study. Int J Clin Pediatr Dent. 2020;13(6):640-3. Epub 2021/05/13. doi: 10.5005/jp-journals-10005-1850. PubMed PMID: 33976489; PubMed Central PMCID: PMCPMC8060939.
25	Mistry KS, Sanghvi Z, Parmar G, Shah S, Pushpalatha K. Antibacterial efficacy of Azadirachta indica, Mimusops elengi and 2% CHX on multispecies dentinal biofilm. J Conserv Dent. 2015;18(6):461-6. Epub 2016/01/12. doi: 10.4103/0972-0707.168810. PubMed PMID: 26752840; PubMed Central PMCID: PMCPMC4693319.
26	Blum FC, Singh J, Merrell DS. In vitro activity of neem (Azadirachta indica) oil extract against Helicobacter pylori. J Ethnopharmacol. 2019;232:236-43. Epub 2018/12/24. doi: 10.1016/j.jep.2018.12.025. PubMed PMID: 30578933.
27	Wylie MR, Windham IH, Blum FC, Wu H, Merrell DS. In vitro antibacterial activity of nimbolide against Helicobacter pylori. J Ethnopharmacol. 2021:114828. Epub 2021/11/12. doi: 10.1016/j.jep.2021.114828. PubMed PMID: 34763046.
28	Saxena A, Arivaradarajan P, Mukhopadhyay AK, Nandi SP. Bactericidal effect of neem (Azadirachta indica) leaf extract on Helicobacter pylori. Journal of Environmental Biology. 2021;42:1591-7. doi: 10.22438/eb/42/6/MRN-2070.
29	Dahiya P, Purkayastha S. Phytochemical Screening and Antimicrobial Activity of Some Medicinal Plants Against Multi-drug Resistant Bacteria from Clinical Isolates. Indian J Pharm Sci. 2012;74(5):443-50. Epub 2013/05/30. doi: 10.4103/0250-474X.108420. PubMed PMID: 23716873; PubMed Central PMCID: PMCPMC3660871.
30	Lakkim V, Reddy MC, Pallavali RR, Reddy KR, Reddy CV, Inamuddin, et al. Green Synthesis of Silver Nanoparticles and Evaluation of Their Antibacterial Activity against Multidrug-Resistant Bacteria and Wound Healing Efficacy Using a Murine Model. Antibiotics (Basel). 2020;9(12). Epub 2020/12/17. doi: 10.3390/antibiotics9120902. PubMed PMID: 33322213; PubMed Central PMCID: PMCPMC7763323.
31	Tasanarong T, Patntirapong S, Aupaphong V. The inhibitory effect of a novel neem paste against cariogenic bacteria. J Clin Exp Dent. 2021;13(11):e1083-e8. Epub 2021/11/27. doi: 10.4317/jced.58781. PubMed PMID: 34824693; PubMed Central PMCID: PMCPMC8601697 that could influence their work.
32	Mahfuzul Hoque MD, Bari ML, Inatsu Y, Juneja VK, Kawamoto S. Antibacterial activity of guava (Psidium guajava L.) and Neem (Azadirachta indica A. Juss.) extracts against foodborne pathogens and spoilage bacteria. Foodborne Pathog Dis. 2007;4(4):481-8. Epub 2007/11/29. doi: 10.1089/fpd.2007.0040. PubMed PMID: 18041957.
33	Quelemes PV, Perfeito ML, Guimaraes MA, dos Santos RC, Lima DF, Nascimento C, et al. Effect of neem (Azadirachta indica A. Juss) leaf extract on resistant Staphylococcus aureus biofilm formation and Schistosoma mansoni worms. J Ethnopharmacol. 2015;175:287-94. Epub 2015/09/27. doi: 10.1016/j.jep.2015.09.026. PubMed PMID: 26408045.
34	S LP, A U, S JG. Investigation on the biofilm eradication potential of selected medicinal plants against methicillin-resistant Staphylococcus aureus. Biotechnol Rep (Amst). 2020;28:e00523. Epub 2020/10/01. doi: 10.1016/j.btre.2020.e00523. PubMed PMID: 32995315; PubMed Central PMCID: PMCPMC7502823.
35	Heyman L, Houri-Haddad Y, Heyman SN, Ginsburg I, Gleitman Y, Feuerstein O. Combined antioxidant effects of Neem extract, bacteria, red blood cells and Lysozyme: possible relation to periodontal disease. BMC Complement Altern Med. 2017;17(1):399. Epub 2017/08/12. doi: 10.1186/s12906-017-1900-3. PubMed PMID: 28797303; PubMed Central PMCID: PMCPMC5553582.
36	Garg R, Perveen S, Gupta B, Bajpai VK, editors. Evaluation of Antibacterial Activity of Annona squamosa, Psidium guajava and Azadirachta indica against Pathogenic Bacterial Cultures2015.
37	H. Tesso AKN, and K. Kumsa. Antibacterial activity and phytochemical screening of some important medicinal plants against human diarrheal pathogens in Adama city, Ethiopia. International Journal of Microbiology and Immunology Research. 2015;3(3):029-35.
38	Essuman EK, Boakye AA, Tettey CO, Hunkpe G, Kortei NK, Kwansa-Bentum H, et al. Evaluation of the Antidiarrheal and Antioxidant Effects of Some Chewing Sticks Commonly Used for Oral Hygiene in Ghana. Evid Based Complement Alternat Med. 2021;2021:7270250. Epub 2021/10/16. doi: 10.1155/2021/7270250. PubMed PMID: 34650615; PubMed Central PMCID: PMCPMC8510806.
39	Al Akeel R, Mateen A, Janardhan K, Gupta VC. Analysis of anti-bacterial and anti oxidative activity of Azadirachta indica bark using various solvents extracts. Saudi J Biol Sci. 2017;24(1):11-4. Epub 2017/01/06. doi: 10.1016/j.sjbs.2015.08.006. PubMed PMID: 28053565; PubMed Central PMCID: PMCPMC5198926.
40	Andonissamy L, Karthigeyan S, Ali SA, Felix JW. Effect of Chemical Denture Disinfectants and Tree Extracts on Biofilm-forming Staphylococcus aureus and Viridans Streptococcus Species Isolated from Complete Denture. J Contemp Dent Pract. 2019;20(11):1307-14. Epub 2020/01/02. PubMed PMID: 31892683.
41	Hussain F, Khurshid MF, Masood R, Ibrahim W. Developing antimicrobial calcium alginate fibres from neem and papaya leaves extract. J Wound Care. 2017;26(12):778-83. Epub 2017/12/16. doi: 10.12968/jowc.2017.26.12.778. PubMed PMID: 29244971.
42	Raju D, Jose J. Development and evaluation of novel topical gel of neem extract for the treatment of bacterial infections. J Cosmet Dermatol. 2019;18(6):1776-83. Epub 2019/04/24. doi: 10.1111/jocd.12965. PubMed PMID: 31012982.
43	Guchhait KC, Manna T, Barai M, Karmakar M, Nandi SK, Jana D, et al. Antibiofilm and anticancer activities of unripe and ripe Azadirachta indica (neem) seed extracts. BMC Complement Med Ther. 2022;22(1):42. Epub 2022/02/15. doi: 10.1186/s12906-022-03513-4. PubMed PMID: 35152903; PubMed Central PMCID: PMCPMC8843028.
44	Ali A, Shahid MA, Hossain MD, Islam MN. Antibacterial bi-layered polyvinyl alcohol (PVA)-chitosan blend nanofibrous mat loaded with Azadirachta indica (neem) extract. Int J Biol Macromol. 2019;138:13-20. Epub 2019/07/07. doi: 10.1016/j.ijbiomac.2019.07.015. PubMed PMID: 31279061.
45	Anand PJ, Athira S, Chandramohan S, Ranjith K, Raj VV, Manjula VD. Comparison of efficacy of herbal disinfectants with chlorhexidine mouthwash on decontamination of toothbrushes: An experimental trial. J Int Soc Prev Community Dent. 2016;6(1):22-7. Epub 2016/03/25. doi: 10.4103/2231-0762.175406. PubMed PMID: 27011928; PubMed Central PMCID: PMCPMC4784059.
46	Bansal V, Gupta M, Bhaduri T, Shaikh SA, Sayed FR, Bansal V, et al. Assessment of Antimicrobial Effectiveness of Neem and Clove Extract Against Streptococcus mutans and Candida albicans: An In vitro Study. Niger Med J. 2019;60(6):285-9. Epub 2020/03/18. doi: 10.4103/nmj.NMJ_20_19. PubMed PMID: 32180657; PubMed Central PMCID: PMCPMC7053276.
47	Kankariya AR, Patel AR, Kunte SS. The effect of different concentrations of water soluble azadirachtin (neem metabolite) on Streptococcus mutans compared with chlorhexidine. J Indian Soc Pedod Prev Dent. 2016;34(2):105-10. Epub 2016/04/16. doi: 10.4103/0970-4388.180394. PubMed PMID: 27080957.
48	Selvaraj K, Bharath N, Natarajan R, Dinesh S, Murugesan S, Selvaraj S. Comparative Evaluation of Antimicrobial Efficacy of Toothpastes Containing Probiotic and Neem as Primary Ingredient on Salivary Streptococcus mutans in Melmaruvathur Population: An In Vivo Study. J Pharm Bioallied Sci. 2020;12(Suppl 1):S595-S600. Epub 2020/11/06. doi: 10.4103/jpbs.JPBS_209_20. PubMed PMID: 33149527; PubMed Cen…
49	Nimbulkar G, Garacha V, Shetty V, Bhor K, Srivastava KC, Shrivastava D, et al. Microbiological and Clinical evaluation of Neem gel and Chlorhexidine gel on Dental Plaque and Gingivitis in 20-30 Years Old Adults: A Randomized Parallel-Armed, Double-Blinded Controlled Trial. J Pharm Bioallied Sci. 2020;12(Suppl 1):S345-S51. Epub 2020/11/06. doi: 10.4103/jpbs.JPBS_101_20. PubMed PMID: 33149484; PubM…
50	Thakurta P, Bhowmik P, Mukherjee S, Hajra TK, Patra A, Bag PK. Antibacterial, antisecretory and antihemorrhagic activity of Azadirachta indica used to treat cholera and diarrhea in India. J Ethnopharmacol. 2007;111(3):607-12. Epub 2007/02/23. doi: 10.1016/j.jep.2007.01.022. PubMed PMID: 17314018.
51	Morales-Covarrubias MS, Garcia-Aguilar N, Bolan-Mejia MD, Puello-Cruz AC. Evaluation of medicinal plants and colloidal silver efficiency against Vibrio parahaemolyticus infection in Litopenaeus vannamei cultured at low salinity. Dis Aquat Organ. 2016;122(1):57-65. Epub 2016/12/03. doi: 10.3354/dao03060. PubMed PMID: 27901504.
52	Rodrigues MP, Astoreca AL, Oliveira AA, Salvato LA, Biscoto GL, Keller LAM, et al. In Vitro Activity of Neem (Azadirachta indica) Oil on Growth and Ochratoxin A Production by Aspergillus carbonarius Isolates. Toxins (Basel). 2019;11(10). Epub 2019/10/09. doi: 10.3390/toxins11100579. PubMed PMID: 31590398; PubMed Central PMCID: PMCPMC6833479.
53	An A, Je A, Cb U, Mn I. Identification and control of specific aflatoxin-producing fungi in stored maize seeds in awka using azadirachta indica (neem) and garcinia kola seeds. Pak J Pharm Sci. 2019;32(4):1679-86. Epub 2019/10/15. PubMed PMID: 31608890.
54	Ezeonu CS, Tatah VS, Imo C, Mamma E, Mayel MH, Kukoyi AJ, et al. Inhibitory Effect of Aqueous and Ethanolic Extracts of Neem Parts on Fungal Rot Disease of <i>Solanum tuberosum</i>. Pak J Biol Sci. 2019;22(5):206-13. Epub 2020/01/14. doi: 10.3923/pjbs.2019.206.213. PubMed PMID: 31930863.
55	Sultana B, Naseer R, Nigam P. Utilization of agro-wastes to inhibit aflatoxins synthesis by Aspergillus parasiticus: A biotreatment of three cereals for safe long-term storage. Bioresour Technol. 2015;197:443-50. Epub 2015/09/12. doi: 10.1016/j.biortech.2015.08.113. PubMed PMID: 26356116.
56	Joy Sinha D, Garg P, Verma A, Malik V, Maccune ER, Vasudeva A. Dentinal Tubule Disinfection with Propolis & Two Extracts of Azadirachta indica Against Candida albicans Biofilm Formed on Tooth Substrate. Open Dent J. 2015;9:369-74. Epub 2015/01/01. doi: 10.2174/1874210601509010369. PubMed PMID: 26962368; PubMed Central PMCID: PMCPMC4763964.
57	Al Saiqali M, Tangutur AD, Banoth C, Bhukya B. Antimicrobial and anticancer potential of low molecular weight polypeptides extracted and characterized from leaves of Azadirachta indica. Int J Biol Macromol. 2018;114:906-21. Epub 2018/04/02. doi: 10.1016/j.ijbiomac.2018.03.169. PubMed PMID: 29605257.
58	Dwivedi VD, Bharadwaj S, Afroz S, Khan N, Ansari MA, Yadava U, et al. Anti-dengue infectivity evaluation of bioflavonoid from Azadirachta indica by dengue virus serine protease inhibition. J Biomol Struct Dyn. 2021;39(4):1417-30. Epub 2020/02/29. doi: 10.1080/07391102.2020.1734485. PubMed PMID: 32107969.
59	Dwivedi VD, Tripathi IP, Mishra SK. In silico evaluation of inhibitory potential of triterpenoids from Azadirachta indica against therapeutic target of dengue virus, NS2B-NS3 protease. J Vector Borne Dis. 2016;53(2):156-61. Epub 2016/06/30. PubMed PMID: 27353586.
60	Lavanya P, Ramaiah S, Anbarasu A. Computational analysis reveal inhibitory action of nimbin against dengue viral envelope protein. Virusdisease. 2015;26(4):243-54. Epub 2015/12/09. doi: 10.1007/s13337-015-0280-x. PubMed PMID: 26645034; PubMed Central PMCID: PMCPMC4663709.
61	Ashfaq UA, Jalil A, Ul Qamar MT. Antiviral phytochemicals identification from Azadirachta indica leaves against HCV NS3 protease: an in silico approach. Nat Prod Res. 2016;30(16):1866-9. Epub 2015/08/15. doi: 10.1080/14786419.2015.1075527. PubMed PMID: 26274064.
62	Tiwari V, Darmani NA, Yue BY, Shukla D. In vitro antiviral activity of neem (Azardirachta indica L.) bark extract against herpes simplex virus type-1 infection. Phytother Res. 2010;24(8):1132-40. Epub 2009/12/31. doi: 10.1002/ptr.3085. PubMed PMID: 20041417; PubMed Central PMCID: PMCPMC3767196.
63	Faccin-Galhardi LC, Ray S, Lopes N, Ali I, Espada SF, Dos Santos JP, et al. Assessment of antiherpetic activity of nonsulfated and sulfated polysaccharides from Azadirachta indica. Int J Biol Macromol. 2019;137:54-61. Epub 2019/06/22. doi: 10.1016/j.ijbiomac.2019.06.129. PubMed PMID: 31226380.
64	Mbah AU, Udeinya IJ, Shu EN, Chijioke CP, Nubila T, Udeinya F, et al. Fractionated neem leaf extract is safe and increases CD4+ cell levels in HIV/AIDS patients. Am J Ther. 2007;14(4):369-74. Epub 2007/08/02. doi: 10.1097/MJT.0b013e3180a72199. PubMed PMID: 17667213.
65	Udeinya IJ, Mbah AU, Chijioke CP, Shu EN. An antimalarial extract from neem leaves is antiretroviral. Trans R Soc Trop Med Hyg. 2004;98(7):435-7. Epub 2004/05/13. doi: 10.1016/j.trstmh.2003.10.016. PubMed PMID: 15138081.
66	Olwenyi OA, Asingura B, Naluyima P, Anywar GU, Nalunga J, Nakabuye M, et al. In-vitro Immunomodulatory activity of Azadirachta indica A.Juss. Ethanol: water mixture against HIV associated chronic CD4(+) T-cell activation/ exhaustion. BMC Complement Med Ther. 2021;21(1):114. Epub 2021/04/11. doi: 10.1186/s12906-021-03288-0. PubMed PMID: 33836748; PubMed Central PMCID: PMCPMC8034071.
67	Ahmad A, Javed MR, Rao AQ, Husnain T. Designing and screening of universal drug from neem (Azadirachta indica) and standard drug chemicals against influenza virus nucleoprotein. BMC Complement Altern Med. 2016;16(1):519. Epub 2016/12/18. doi: 10.1186/s12906-016-1469-2. PubMed PMID: 27986088; PubMed Central PMCID: PMCPMC5162082.
68	Ahmad A, Ahad A, Rao AQ, Husnain T. Molecular docking based screening of neem-derived compounds with the NS1 protein of Influenza virus. Bioinformation. 2015;11(7):359-65. Epub 2015/09/05. doi: 10.6026/97320630011359. PubMed PMID: 26339153; PubMed Central PMCID: PMCPMC4546996.
69	Dwivedi VD, Singh A, El-Kafraway SA, Alandijany TA, Faizo AA, Bajrai LH, et al. Mechanistic insights into the Japanese encephalitis virus RNA dependent RNA polymerase protein inhibition by bioflavonoids from Azadirachta indica. Sci Rep. 2021;11(1):18125. Epub 2021/09/15. doi: 10.1038/s41598-021-96917-0. PubMed PMID: 34518560; PubMed Central PMCID: PMCPMC8437980.
70	Baildya N, Khan AA, Ghosh NN, Dutta T, Chattopadhyay AP. Screening of potential drug from Azadirachta Indica (Neem) extracts for SARS-CoV-2: An insight from molecular docking and MD-simulation studies. J Mol Struct. 2021;1227:129390. Epub 2020/10/13. doi: 10.1016/j.molstruc.2020.129390. PubMed PMID: 33041371; PubMed Central PMCID: PMCPMC7532348.
71	Borkotoky S, Banerjee M. A computational prediction of SARS-CoV-2 structural protein inhibitors from Azadirachta indica (Neem). J Biomol Struct Dyn. 2021;39(11):4111-21. Epub 2020/05/29. doi: 10.1080/07391102.2020.1774419. PubMed PMID: 32462988; PubMed Central PMCID: PMCPMC7311162.
72	Vardhan S, Sahoo SK. In silico ADMET and molecular docking study on searching potential inhibitors from limonoids and triterpenoids for COVID-19. Comput Biol Med. 2020;124:103936. Epub 2020/08/02. doi: 10.1016/j.compbiomed.2020.103936. PubMed PMID: 32738628; PubMed Central PMCID: PMCPMC7386496.
73	Gogoi B, Chowdhury P, Goswami N, Gogoi N, Naiya T, Chetia P, et al. Identification of potential plant-based inhibitor against viral proteases of SARS-CoV-2 through molecular docking, MM-PBSA binding energy calculations and molecular dynamics simulation. Mol Divers. 2021;25(3):1963-77. Epub 2021/04/16. doi: 10.1007/s11030-021-10211-9. PubMed PMID: 33856591; PubMed Central PMCID: PMCPMC8047602.
74	Parida PK, Paul D, Chakravorty D. The natural way forward: Molecular dynamics simulation analysis of phytochemicals from Indian medicinal plants as potential inhibitors of SARS-CoV-2 targets. Phytother Res. 2020;34(12):3420-33. Epub 2020/09/25. doi: 10.1002/ptr.6868. PubMed PMID: 32969524; PubMed Central PMCID: PMCPMC7537166.
75	Balkrishna A, Mittal R, Arya V. Computational Evidences of Phytochemical Mediated Disruption of PLpro Driven Replication of SARS-CoV-2: A Therapeutic Approach against COVID-19. Curr Pharm Biotechnol. 2021;22(10):1350-9. Epub 2020/11/13. doi: 10.2174/1389201021999201110204116. PubMed PMID: 33176643.
76	Nallusamy S, Mannu J, Ravikumar C, Angamuthu K, Nathan B, Nachimuthu K, et al. Exploring Phytochemicals of Traditional Medicinal Plants Exhibiting Inhibitory Activity Against Main Protease, Spike Glycoprotein, RNA-dependent RNA Polymerase and Non-Structural Proteins of SARS-CoV-2 Through Virtual Screening. Front Pharmacol. 2021;12:667704. Epub 2021/07/27. doi: 10.3389/fphar.2021.667704. PubMed PM…
77	Navabshan I, Sakthivel B, Pandiyan R, Antoniraj MG, Dharmaraj S, Ashokkumar V, et al. Computational Lock and Key and Dynamic Trajectory Analysis of Natural Biophors Against COVID-19 Spike Protein to Identify Effective Lead Molecules. Mol Biotechnol. 2021;63(10):898-908. Epub 2021/06/24. doi: 10.1007/s12033-021-00358-z. PubMed PMID: 34159564; PubMed Central PMCID: PMCPMC8219180.
78	Vardhan S, Sahoo SK. Virtual screening by targeting proteolytic sites of furin and TMPRSS2 to propose potential compounds obstructing the entry of SARS-CoV-2 virus into human host cells. J Tradit Complement Med. 2022;12(1):6-15. Epub 2021/04/20. doi: 10.1016/j.jtcme.2021.04.001. PubMed PMID: 33868970; PubMed Central PMCID: PMCPMC8040387.
79	Ogidigo JO, Iwuchukwu EA, Ibeji CU, Okpalefe O, Soliman MES. Natural phyto, compounds as possible noncovalent inhibitors against SARS-CoV2 protease: computational approach. J Biomol Struct Dyn. 2022;40(5):2284-301. Epub 2020/10/27. doi: 10.1080/07391102.2020.1837681. PubMed PMID: 33103616; PubMed Central PMCID: PMCPMC7596894.
80	Garg S, Anand A, Lamba Y, Roy A. Molecular docking analysis of selected phytochemicals against SARS-CoV-2 M(pro) receptor. Vegetos. 2020;33(4):766-81. Epub 2020/10/27. doi: 10.1007/s42535-020-00162-1. PubMed PMID: 33100613; PubMed Central PMCID: PMCPMC7567421.
81	Sarkar L, Oko L, Gupta S, Bubak AN, Das B, Gupta P, et al. Azadirachta indica A. Juss bark extract and its Nimbin isomers restrict beta-coronaviral infection and replication. Virology. 2022;569:13-28. Epub 2022/02/27. doi: 10.1016/j.virol.2022.01.002. PubMed PMID: 35219218; PubMed Central PMCID: PMCPMC8844965.
82	Farhan Raza Khan B, MS, FCPS, Aga Khan University. A Double Blind, Randomized Controlled Pilot Trial of Gargling Agents in Reducing Intraoral Viral Load Among Laboratory Confirmed COVID-19 Patients: GARGLES STUDY Identifier NCT04341688. Available from: https://clinicaltrials.gov/ct2/show/NCT04341688.
83	Nesari TM, Bhardwaj A, ShriKrishna R, Ruknuddin G, Ghildiyal S, Das A, et al. Neem (Azadirachta Indica A. Juss) Capsules for Prophylaxis of COVID-19 Infection: A Pilot, Double-Blind, Randomized Controlled Trial. Altern Ther Health Med. 2021;27(S1):196-203. Epub 2021/04/24. PubMed PMID: 33891569.
84	Khan FR, Kazmi SMR, Iqbal NT, Iqbal J, Ali ST, Abbas SA. A quadruple blind, randomised controlled trial of gargling agents in reducing intraoral viral load among hospitalised COVID-19 patients: A structured summary of a study protocol for a randomised controlled trial. Trials. 2020;21(1):785. Epub 2020/09/16. doi: 10.1186/s13063-020-04634-2. PubMed PMID: 32928313; PubMed Central PMCID: PMCPMC7487…
85	Dayakar A, Chandrasekaran S, Veronica J, Sundar S, Maurya R. In vitro and in vivo evaluation of anti-leishmanial and immunomodulatory activity of Neem leaf extract in Leishmania donovani infection. Exp Parasitol. 2015;153:45-54. Epub 2015/03/10. doi: 10.1016/j.exppara.2015.02.011. PubMed PMID: 25747203.
86	Tepongning RN, Mbah JN, Avoulou FL, Jerme MM, Ndanga EK, Fekam FB. Hydroethanolic Extracts of Erigeron floribundus and Azadirachta indica Reduced Plasmodium berghei Parasitemia in Balb/c Mice. Evid Based Complement Alternat Med. 2018;2018:5156710. Epub 2018/11/14. doi: 10.1155/2018/5156710. PubMed PMID: 30420894; PubMed Central PMCID: PMCPMC6215572.
87	BC A-O, AJ N, S I, HM I, E O, E A, et al. ANTIMALARIAL EFFECT OF NEEM LEAF AND NEEM STEM BARK EXTRACTS ON PLASMODIUM BERGHEI INFECTED IN THE PATHOLOGY AND TREATMENT OF MALARIA. International Journal of Research in Biochemistry and Biophysics. 2013;3(1):7-14.
88	Alaribe SC, Oladipupo AR, Uche GC, Onumba MU, Ota D, Awodele O, et al. Suppressive, curative, and prophylactic potentials of an antimalarial polyherbal mixture and its individual components in Plasmodium berghei-Infected mice. J Ethnopharmacol. 2021;277:114105. Epub 2021/05/08. doi: 10.1016/j.jep.2021.114105. PubMed PMID: 33961995.
89	Habluetzel A, Pinto B, Tapanelli S, Nkouangang J, Saviozzi M, Chianese G, et al. Effects of Azadirachta indica seed kernel extracts on early erythrocytic schizogony of Plasmodium berghei and pro-inflammatory response in inbred mice. Malar J. 2019;18(1):35. Epub 2019/02/10. doi: 10.1186/s12936-019-2671-8. PubMed PMID: 30736813; PubMed Central PMCID: PMCPMC6368791.
90	Tapanelli S, Chianese G, Lucantoni L, Yerbanga RS, Habluetzel A, Taglialatela-Scafati O. Transmission blocking effects of neem (Azadirachta indica) seed kernel limonoids on Plasmodium berghei early sporogonic development. Fitoterapia. 2016;114:122-6. Epub 2016/09/20. doi: 10.1016/j.fitote.2016.09.008. PubMed PMID: 27642038.
91	Somsak V, Chachiyo S, Jaihan U, Nakinchat S. Protective Effect of Aqueous Crude Extract of Neem (Azadirachta indica) Leaves on Plasmodium berghei-Induced Renal Damage in Mice. J Trop Med. 2015;2015:961205. Epub 2015/09/18. doi: 10.1155/2015/961205. PubMed PMID: 26379714; PubMed Central PMCID: PMCPMC4562167.
92	Gathirwa JW, Rukunga GM, Mwitari PG, Mwikwabe NM, Kimani CW, Muthaura CN, et al. Traditional herbal antimalarial therapy in Kilifi district, Kenya. J Ethnopharmacol. 2011;134(2):434-42. Epub 2011/01/08. doi: 10.1016/j.jep.2010.12.043. PubMed PMID: 21211554.
93	Benoit F, Valentin A, Pelissier Y, Diafouka F, Marion C, Kone-Bamba D, et al. In vitro antimalarial activity of vegetal extracts used in West African traditional medicine. Am J Trop Med Hyg. 1996;54(1):67-71. Epub 1996/01/01. doi: 10.4269/ajtmh.1996.54.67. PubMed PMID: 8651373.
94	MacKinnon S, Durst T, Arnason JT, Angerhofer C, Pezzuto J, Sanchez-Vindas PE, et al. Antimalarial activity of tropical Meliaceae extracts and gedunin derivatives. J Nat Prod. 1997;60(4):336-41. Epub 1997/04/01. doi: 10.1021/np9605394. PubMed PMID: 9134742.
95	Amadi PU, Agomuo EN, Ukaga CN, Njoku UC, Amadi JA, Nwaekpe CG. Preclinical Trial of Traditional Plant Remedies for the Treatment of Complications of Gestational Malaria. Medicines (Basel). 2021;8(12). Epub 2021/12/24. doi: 10.3390/medicines8120079. PubMed PMID: 34940291; PubMed Central PMCID: PMCPMC8703497.
96	Okoh MP, Singla RK, Madu C, Soremekun O, Adejoh J, Alli LA, et al. Phytomedicine in Disease Management: In-Silico Analysis of the Binding Affinity of Artesunate and Azadirachtin for Malaria Treatment. Front Pharmacol. 2021;12:751032. Epub 2021/12/18. doi: 10.3389/fphar.2021.751032. PubMed PMID: 34916935; PubMed Central PMCID: PMCPMC8669099.
97	Ash A, Bharitkar YP, Murmu S, Hazra A, Ravichandiran V, Kar PK, et al. Ultrastructural changes in Raillietina (Platyhelminthes: cestoda), exposed to sulfonoquinovosyldiacylglyceride (SQDG), isolated from Neem (Azadirachta indica). Nat Prod Res. 2017;31(20):2445-9. Epub 2017/03/30. doi: 10.1080/14786419.2017.1305383. PubMed PMID: 28347172.
98	Jamra N, Das G, Singh P, Haque M. Anthelmintic efficacy of crude neem (Azadirachta indica) leaf powder against bovine strongylosis. J Parasit Dis. 2015;39(4):786-8. Epub 2015/12/22. doi: 10.1007/s12639-014-0423-9. PubMed PMID: 26688654; PubMed Central PMCID: PMCPMC4675597.
